1 **TEMPERATURE AND NUTRIENT CONDITIONS MODIFY THE EFFECTS OF**  
2 **PHENOLOGICAL SHIFTS IN PREDATOR-PREY COMMUNITIES**

3 V.H.W. RUDOLF

4 BIOSCIENCES, RICE UNIVERSITY

5 HOUSTON, TX, 77005, USA

6 Email: [Volker.rudolf@rice.edu](mailto:Volker.rudolf@rice.edu)

7

8 Word count 6115

9 Figures 5

10 Tables 2

11

12

## 13 **Abstract**

14 While there is mounting evidence indicating that the relative timing of predator and prey  
15 phenologies shapes the outcome of trophic interactions, we still lack a comprehensive  
16 understanding of how important the environmental context (e.g. abiotic conditions) is for shaping  
17 this relationship. Environmental conditions not only frequently drive shifts in phenologies, but  
18 they can also affect the very same processes that mediate the effects of phenological shifts on  
19 species interactions. Thus, identifying how environmental conditions shape the effects of  
20 phenological shifts is key to predict community dynamics across a heterogenous landscape and  
21 how they will change with ongoing climate change in the future. Here I tested how  
22 environmental conditions shape effects of phenological shifts by experimentally manipulating  
23 temperature, nutrient availability, and relative phenologies in two predator-prey freshwater  
24 systems (mole salamander- bronze frog vs dragonfly larvae-leopard frog). This allowed me to (1)  
25 isolate the effect of phenological shifts and different environmental conditions, (2) determine  
26 how they interact, and (3) how consistent these patterns are across different species and  
27 environments. I found that delaying prey arrival dramatically increased predation rates, but these  
28 effects were contingent on environmental conditions and predator system. While both nutrient  
29 addition and warming significantly enhanced the effect of arrival time, their effect was  
30 qualitatively different: Nutrient addition enhanced the positive effect of early arrival while  
31 warming enhanced the negative effect of arriving late. Predator responses varied qualitatively  
32 across predator-prey systems. Only in the system with strong gape-limitation were predators  
33 (salamanders) significantly affected by prey arrival time and this effect varied with  
34 environmental context. Correlations between predator and prey demographic rates suggest that  
35 this was driven by shifts in initial predator-prey size ratios and a positive feedback between size-

36 specific predation rates and predator growth rates. These results highlight the importance of  
37 accounting for temporal and spatial correlation of local environmental conditions and gape-  
38 limitation in predator-prey systems when predicting the effects of phenological shifts and climate  
39 change on predator-prey systems.

40 **Keywords:** Trophic mismatch, phenology, climate change, synchrony, timing, global warming

41

## 42 **Introduction**

43 Phenology, the seasonal timing of life-history events, is a key force structuring species  
44 interactions. The relative timing of phenologies within a community determines what species and  
45 stages co-occur and thus can interact directly, when interactions start, and how long they last  
46 (Yang and Rudolf 2010). However, the relative timing of phenologies naturally vary across time  
47 and space (Carter et al. 2018, Rudolf 2018, Roslin et al. 2021) and is further altered by ongoing  
48 climate change (Parmesan and Yohe 2003, Visser and Both 2005, Cohen et al. 2018, Kharouba  
49 et al. 2018). While recent studies indicate that these changes in the relative timing of phenologies  
50 can alter the outcome of interactions and change long-term conditions for persistence and  
51 coexistence (Rudolf 2019), we are still lacking a general understanding of how important the  
52 environmental context (e.g. abiotic conditions) is for mediating the effects of phenological shifts.  
53 Yet environmental conditions vary across space and time (including climate change), and these  
54 differences are often (Visser and Holleman 2001, Durant et al. 2007, Dijkstra et al. 2011,  
55 Ovaskainen et al. 2013, Cohen et al. 2018), but not always (Roslin et al. 2021), the driver of  
56 phenological shifts. Thus, elucidating how the effects of phenological shifts vary across  
57 environmental conditions is not only essential to understand community dynamics across

58 heterogeneous landscapes, but also key to predict how they will change in the future with  
59 ongoing climate change.

60           The potential for environmental conditions to modify the effects of phenological shifts  
61 becomes quickly clear when we focus on the link between phenologies and interactions.  
62 Phenological shifts can directly alter species interactions in at least two key ways: (i) by  
63 changing the temporal overlap of interacting species which determines their “interaction  
64 potential” (Carter et al. 2018) (i.e. how many individuals interact and for how long), and (ii)  
65 through shifts in per capita interaction strength (Rudolf 2019). Importantly, both mechanisms  
66 depend on growth and developmental rates of individuals. The duration of interactions between  
67 life-history stages (i.e. temporal overlap) generally decreases with higher growth and/or  
68 developmental rates because individuals transition to the next life history stage (phenophase)  
69 faster. Changes in per-capita effects driven by phenological shifts are frequently caused by  
70 concurrent shifts in size-ratios of interacting species: differences in arrival time allow early  
71 arrivers to grow and increase in relative size which determines per capita interaction strength  
72 (size-mediated priority effects) (Rasmussen et al. 2014). This suggests that any change in  
73 environmental conditions that influence the growth (and/or developmental) rates of species, such  
74 as temperature or nutrient availability, could also modify the consequences of phenological shifts  
75 for species interactions. Moreover, if these conditions have the same effect on growth rates we  
76 might also expect that they have the same qualitative effects on phenological shifts. If true, this  
77 would allow for general “rules of thumb” to predict what conditions strengthen or weaken effects  
78 of phenological shifts.

79           Despite the clear potential for environmental conditions to alter the effects of  
80 phenological shifts, this is rarely tested explicitly, and much remains unknown. Previous studies

81 either examined phenological shifts only in one environmental context (e.g. Alford 1989, Nosaka  
82 et al. 2014, Rasmussen et al. 2014, Rasmussen and Rudolf 2016, Anderson et al. 2017), or used  
83 observational data (Durant et al. 2007, Visser and Gienapp 2019) for which the covariance of  
84 phenological shifts and environmental conditions make it inherently difficult to isolate individual  
85 and interactive effects of phenology vs. environment (Rafferty et al. 2013). The few recent  
86 experiments that manipulate phenologies either across different temperature or nutrient  
87 conditions seem to provide first support for context-dependent yet predictable effects of  
88 phenological shifts (Rudolf and Singh 2013, Rudolf 2018, Rudolf and McCrory 2018). However,  
89 these experiments only studied one environmental factor at a time and thus do not allow for  
90 direct comparisons of different environmental factors. Furthermore, they only focused on  
91 systems where species from the same trophic level compete for shared resources, and it is not  
92 straightforward to extrapolate their results to predator-prey systems. As a consequence, it  
93 remains unclear how different environmental conditions affect phenological shifts in predator-  
94 prey systems.

95         To understand the differences between competitive and predator-prey systems, let's focus  
96 on two well-studied environmental factors: temperature and nutrient availability. With resource  
97 competition, interacting species experience the same temperature and the same nutrient levels  
98 and both are increasing growth and developmental rates. Thus, it is perhaps not surprising that  
99 both environmental factors appear to have qualitatively similar effects on phenological shifts in  
100 competitive systems (Rudolf and Singh 2013, Rudolf 2018, Rudolf and McCrory 2018). In  
101 contrast, predator and prey both experience the same temperatures, but they consume different  
102 resources and thus could respond differentially. For instance, an increase in primary productivity  
103 will directly benefit an herbivore, but not its specialized predator. The predator could still benefit

104 indirectly if the available prey biomass eventually increases, but the response would be delayed,  
105 and increased growth rates of the prey would still likely reduce the time the prey is vulnerable to  
106 predation. A higher prey growth rate could be particularly important in systems with strongly  
107 gape-limited predators (e.g. predators that swallow prey whole) because it would allow prey to  
108 reach a size refuge and thus “escape” predation at an earlier stage (Wilbur 1988, Urban 2007).  
109 This suggests that nutrient availability and temperature could have qualitatively different effects  
110 on phenological shifts in predator-prey systems, and the effects could further depend on how  
111 gape-limited predators are.

112         Finally, we should not forget that temperature and nutrient availability also have different  
113 direct effects on other aspects of predator-prey interactions. Temperature directly affects size-  
114 specific predation rates, e.g. due to changes in attack rates and handling time (Uiterwaal and  
115 DeLong 2020). For instance, a moderate increase in temperature typically increases size-specific  
116 per-capita consumption rates of predators (Jara et al. 2019) and strengthens top-down control  
117 (Barton and Schmitz 2009, Shurin et al. 2012). In contrast, nutrient availability does not have  
118 this direct effect on per-capita predation rates. Indeed, increasing nutrient availability may  
119 instead indirectly decrease predation rates, e.g. by increasing availability of alternative prey  
120 (Chesson 1989, Rudolf 2008). Overall, this suggests that while temperature and nutrient  
121 availability both clearly have the potential to modify the consequences of phenological shifts in  
122 predator-prey systems, their individual effects could be qualitatively different compared to  
123 competitive systems and even vary across different predator-prey systems.

124         Here I take an experimental approach to test how environmental conditions influence the  
125 effects of phenological shifts on predator-prey interactions in two freshwater systems.  
126 Specifically, I experimentally manipulated the relative arrival time of a predator and its prey

127 under different nutrient and temperature conditions. This allowed me to determine (1) how  
128 temperature and nutrient availability alter effects of phenological shifts, (2) whether this  
129 interactive effect qualitatively differs between both environmental factors, and (3) if their effects  
130 are independent or synergistic. Furthermore, I repeated the same experiment in two different  
131 predator-prey systems to determine (4) whether patterns are general or contingent on specific  
132 traits (e.g. gape-limitation) of predators and prey. Overall, results indicate that the phenological  
133 shifts affect demographic traits of both predator and prey, but the effects are modified by  
134 warming and nutrient availability and thus depend on the environmental context.

## 135 **Methods**

### 136 *Study Species*

137 I focused on two different predator-prey systems that are commonly found in fishless  
138 temporary ponds throughout the southwest of North America: (I) dragonfly larvae of the green  
139 darner *Anax junius* (predator) and tadpoles of the southern leopard frog *Rana (Lithobates)*  
140 *sphenocephala* (prey), and (II) larvae of the mole salamander *Ambystoma talpoideum* and  
141 tadpoles of the bronze frog *Rana (Lithobates) clamitans*. Phenologies of these species vary  
142 naturally across years with changes in weather conditions. Because species respond differently to  
143 weather conditions, changes in these conditions result in concurrent changes in the onset of  
144 species interactions (Root et al. 2003, Saenz et al. 2006, Heino et al. 2009, Todd et al. 2011,  
145 Carter et al. 2018). Furthermore, ponds naturally differ in temperature regimes and nutrient input  
146 (e.g. due to variation in canopy cover) (Skelly et al. 2002), creating considerable spatial  
147 heterogeneity in these conditions.

148 The two predator-prey systems differ in many aspects from each other. Larvae of the

149 dragonfly *A. junius* and the salamander *A. talpoideum* are both major predators of tadpoles in  
150 fishless pond communities (Wellborn et al. 1996, Wilbur 1997), but they differ in their  
151 morphology, ecology, and behavior. Specialized mouthparts (two opposing thorn-like structures)  
152 allow dragonflies to capture and consume prey much larger than themselves. In contrast, the  
153 suction feeding of salamanders limits them to consume prey that is smaller than their mouth's  
154 diameter (Urban 2008). This strong gape-limitation allows tadpoles to “escape” predation from  
155 salamander by reaching a size-refuge at a certain predator/prey size ratio (Caldwell et al. 1980,  
156 Urban 2008). This is not the case with dragonfly predators in our system, although successful  
157 attack rates still typically decline with smaller predator/prey size ratios (Caldwell et al. 1980).  
158 Indeed, while monitoring the ponds we observed dragonflies that attacked and ultimately killed  
159 tadpoles many times larger than the dragonflies themselves.

160         The two tadpole species also differ in their growth and developmental rate and phenology  
161 at our field sites in South East Texas. Southern leopard frogs are active foragers with high  
162 growth rates and a mean larval period (hatching to metamorphosis) of 90 days. In contrast,  
163 bronze frog tadpoles are much less active and mostly hide in the substrate and leave litter. As a  
164 consequence, they have lower growth rates and a much longer larval period, lasting up to 22  
165 months, and frequently overwinter in ponds before reaching metamorphosis in spring.

### 166 *Experimental design*

167         Both experiments shared the exact same factorial design which crossed 3 tadpole  
168 phenology (“arrival”) treatments (tadpole addition 0 days, +10 days, or +20 days after predator  
169 addition) with 2 nutrient (ambient vs. enriched) and 2 temperature (ambient vs. heated)  
170 treatments, resulting in a total of  $3 \times 2 \times 2 = 12$  treatments (**Fig. 1**). In the first experiment (with



171 dragonfly predators) each treatment was replicated 5 times. In the second experiment (with  
172 salamander predators) treatments were replicated 4 times because of logistic constraints. A  
173 mistake during early tadpole addition during setup of salamander experiment resulted in uneven  
174 replication in low (ambient) nutrient treatments with 3 replicates for early (day 0) and 5  
175 replicates for intermediate (+10 days) treatments (see supplement for details).

176 To delay prey arrival (hatching) for the different phenology treatments, I transferred all  
177 collected egg clutches to a climate-controlled environmental chamber maintained at 4°C to slow  
178 down development. One week before a given arrival date I transferred a subset of clutches to  
179 another environmental chamber set at 24°C to accelerate development and hatch tadpoles.  
180 Previous experiments indicate that this method can be successfully used to delay hatching by up  
181 to 25 days without measurable effects on tadpole performance (Rudolf and Singh 2013, Rudolf  
182 2018). It also assured that tadpoles from all additions were within the same developmental stage  
183 and had the same size at introduction. For each introduction, I used 3-4 randomly selected egg  
184 clutches and distributed tadpoles from all clutches evenly across replicates. Each replicate in  
185 both experiments received 200 tadpoles of the respective prey species. These starting densities  
186 are well within the natural range of both species we observe in our study region.

187 In the dragonfly experiment, each mesocosm received three small *A. junius* larvae of  
188 equal size (mean head width (HW) = 3.296mm, range = 2.983-3.392mm). Mesocosms in the  
189 salamander experiment each received five small *A. talpoideum* larva. Due to natural variation in  
190 size, salamanders were visually divided into three size classes and each size class was evenly  
191 distributed among replicates to ensure similar mean and variation in predator size across all  
192 replicates (mean HW: 3.655 mm (2.607-4.616), snout-vent length SVL: 11.340 mm (7.769-  
193 15.035). The respective size range of both predators reflects the natural size range of predator

194 populations when tadpoles hatch in natural ponds. The densities of both predators are at the  
195 lower end of natural densities in our study area for the size classes. Differences in initial  
196 densities between both predators reflect species-specific differences in natural densities and  
197 predation rates.

198 I terminated the dragonfly predator experiment after 189 days (January 29<sup>th</sup> - August 5<sup>th</sup>)  
199 and the salamander experiment after 100 days (February 9<sup>th</sup> - May 15<sup>th</sup>). This difference in  
200 duration reflects natural differences in developmental times of predator species: mean emergence  
201 time was 91.9 days (range 62-123 days) for dragonflies and 59.9 for salamanders (range: 49-88  
202 days). The additional time also allowed me to better capture differences in the timing of  
203 metamorphosis of *R. sphenoccephala* (> 80% of individuals reached metamorphosis in all arrival  
204 treatments at end of the experiment), while *R. clamitans* was not close to reaching  
205 metamorphosis due to its naturally slower developmental rate.

#### 206 *Mesocosm setup & maintenance*

207 I conducted experiments in mesocosms consisting of 1,000 L plastic cattle tanks set up  
208 outside at the South Campus Research Facility of Rice University. Mesocosms were evenly  
209 spaced by 0.5m and filled with dechlorinated well water two weeks before tadpole addition. I  
210 covered each mesocosm with 60% shade cloth to reduce unwanted colonization by other  
211 amphibians or predators. To establish natural conditions, I added 1L of dried leaf litter and  
212 500mL of concentrated zooplankton and pond water, collected from fishless ponds where all  
213 species occur naturally. This setup followed well-established protocols and allowed me to create  
214 replicate communities that mimicked key aspects of temporary ponds used by all species (Wilbur  
215 1997, Rudolf and Rasmussen 2013b, Rudolf and Rasmussen 2013a).

216 I manipulated temperature by placing one 300-Watt submersible heater at the center of  
217 each mesocosm one week before the start of the experiment and wrapped each mesocosm with  
218 insulation. This setup allowed heated replicates to follow the same natural daily and seasonal  
219 temperature fluctuations as ambient mesocosms but elevated mean temperatures by  $\sim 4.1^{\circ}\text{C}$  and  
220  $4.7^{\circ}\text{C}$  in salamander and dragonfly predator experiment respectively (supplement **Fig. 1, S1**). I  
221 assigned heating treatments spatially so that no two heated mesocosms were next to each other.  
222 Temperatures were monitored every half hour with iButton® temperature loggers that were  
223 submerged in a subset of heated and ambient mesocosms.

224 Like most freshwater systems, temporary pond communities are frequently limited by  
225 nutrients, especially nitrogen and phosphorus (Schindler 1977, Mischler et al. 2014). Thus, for  
226 the nutrient treatment, I either left mesocosms at ambient levels or added nitrogen and  
227 phosphorus (Nitrogen:7.31g/100L, Phosphorous 0.30618g/1000L). Nutrient additions were  
228 based on similar experiments (Kratina et al. 2012) and pilot studies and ensured a significant  
229 increase in algae growth without the risk of creating large bacterial blooms that can cause anoxic  
230 conditions. In the first experiment (with dragonfly predators) I added nutrients twice, one week  
231 before tadpole addition and then again after tadpole addition. Since I observed a decline in  
232 phosphorus throughout the first experiment, I repeated nutrient additions in the second  
233 experiment 38 days and 94 days after tadpole addition to maintaining elevated nutrient levels  
234 throughout the experiment. Both nutrient additions were successful in significantly elevating  
235 nutrients and primary production (see supplement **Fig. 2, S5**).

236 *Response variables*

237 *Primary producers* - I measured periphyton (benthic algae) density (primary food source of

238 tadpoles) throughout the experiment. I quantified periphyton density by floating 3 microscope  
239 glass slides per mesocosm for 7 days and extracting chlorophyll *a* from periphyton scraped off  
240 from both sides of each slide following standard protocols (Eaton et al. 2005). Slides were  
241 replaced every 1-2 weeks throughout the experiment.

242 *Predator and prey* - I measured predator size (SVL and HW) at each tadpole introduction to  
243 quantifying differences in initial predator size across tadpole introductions using photographs  
244 and ImageJ. Predators, especially dragonflies were very difficult to subsample without draining  
245 mesocosms. Thus, to minimize and standardize disturbance caused by these subsamples, I spend  
246 a fixed time (15 minutes) per mesocosm which assured that I caught at least one predator per  
247 mesocosm. In addition, I measured 20 tadpoles per mesocosm 13-18 days after the final tadpole  
248 introduction to quantifying initial tadpole growth rates.

249 I monitored mesocosms daily and collected all predators and prey that reached  
250 metamorphosis. For tadpoles, day of metamorphosis was defined as the emergence of at least one  
251 forelimb, and all metamorphs were transferred to the lab and weighed after full tail absorption.  
252 Salamander metamorphosis was defined by absorption of external gills. Emerging dragonflies  
253 were easy to count but very difficult to catch alive, preventing us from collecting sufficient body  
254 size data for a full analysis. I calculated growth rates and developmental for all species except *R.*  
255 *clamitans* which did not reach metamorphosis, and final body size/mass for all but *A. junius*. At  
256 the end of the experiment, I destructively sampled all mesocosms and collected any remaining  
257 tadpoles and predators. Surviving tadpoles were photographed to measure the snout-vent length  
258 (SVL). All procedures followed recommended guidelines of the Animal Welfare Act and were  
259 approved by Institutional Animal Care and Use Committee (IACUC protocol A13101101)

260 *Statistical analyses*

261 While both experiments had the exact same setup and design, using different species and  
262 carrying them out in different years inherently results in some natural variation in abiotic and  
263 biotic conditions and what response variables could be quantified. Thus, they should be  
264 considered as two separate experiments that address the same questions and I analyzed them  
265 separately. Any interpretation of differences across experiments should keep these caveats in  
266 mind. However, because both experiments used the same experimental design and asked the  
267 same questions, comparing qualitative relationships across different predator-prey systems still  
268 provides valuable insights into how sensitive results are to differences in species' life histories  
269 and helps identify general patterns.

270 *Predators* – Initial predator-prey size ratios can drive effects of phenological shifts. I  
271 used generalized linear mixed models (GLMM) to test how predator size changed with each prey  
272 introduction and if this relationship was affected by nutrient addition and temperature, using  
273 predator size at each introduction as dependent variable and arrival time (= days since the start of  
274 the experiment), heating, and nutrient addition treatments as predictors, and mesocosm identity  
275 as a random factor to account for non-independence of repeated observations. Note that for the  
276 dragonfly experiment we only measured predator size in mesocosms without prey present, while  
277 I measured predators in all mesocosms in the salamander experiment. However, prey arrival  
278 order did not affect the initial size of salamanders. Therefore, I pooled those treatments for final  
279 analysis. Finally, I used general linear models (GLM) with final predator size (for salamander),  
280 time to emergence, or survival as the response variable, and heating, nutrient, and arrival  
281 treatment and all possible interactions as fixed effects.

282           *Prey* – I used GLMs to analyze treatment effects on per-capita size, daily (dry) biomass  
283 production (final prey dry mass/days since prey addition), and mortality rates (number of prey  
284 that died /days since prey addition). Using daily mortality rate and biomass production allowed  
285 me to correct for inherent differences in the time individuals spent in the experiment across  
286 arrival treatments and thus allows for a direct comparison across arrival treatments. Tadpoles and  
287 metamorphs were all converted to dry mass using established mass-length relationships and dry  
288 mass was summed across metamorphs and tadpoles within a replicate.

289           All analyses were carried out in R using the “lme4” package for GLM analyses and the  
290 “car” package to obtain significance values. I used a binomial error distribution for salamander  
291 survival and Gaussian distributed error for all other analyses. Because of unbalanced replication  
292 in the salamander experiment, P-values are based on type III statistics while all other P-values  
293 are based on type II unless noted otherwise. The corresponding code and data is freely available  
294 online at dryad: (*will be added once accepted for publication*)

## 295 **Results**

### 296 *Changes in initial predator-prey size ratios across prey arrival times*

297 How predator size (measured by head width HW) differed across prey arrival times was  
298 contingent on environmental conditions in both predator systems (significant heating x time  
299 interaction, **Table 1, Fig. 2**). Predator size remained largely unchanged between the last two prey  
300 arrival times (day 10 vs. 20) under ambient conditions, but it increased significantly in heated  
301 systems (**Fig. 2**). Average predator size also increased in heated relative to ambient treatments  
302 (**Fig 2, Table 1**). In contrast, nutrient addition did not affect the size of dragonfly predators, but  
303 it enhanced the positive effect of warming on salamander growth rate and size (**Fig. 2, Table 1**).

304 As a consequence, when prey arrival was delayed by 20 days, salamander predators were up to  
305 68% larger in heated communities with added nutrients (head width 6.24mm) compared to  
306 predators in systems with ambient temperature and nutrient conditions (head width 4.26 mm).

307 *Predator survival, development & growth*

308 Predator survival was high for both predator species, especially for salamander (mean survival =  
309 89.4%). Predator survival significantly decreased when prey were introduced later (**Table 1**) for  
310 salamander but not dragonfly systems. There was some indication of nutrient treatment affecting  
311 arrival in salamander but this was solely driven by a single low survival outlier and not  
312 significant after removing the outlier. Dragonfly survival was driven by three-way interaction  
313 (**Table 1**). Survival increased with delay in arrival time in systems at ambient temperature and  
314 high nutrients or heated and low nutrients, while it remained largely constant or even declined in  
315 the other two treatment combinations. Note that random invasion of dragonfly predators in some  
316 tanks (indicated by the number of survivors > number of added focal individuals) prevented any  
317 exact estimates of dragonfly survival.

318 Both predator species had significantly higher developmental rates resulting in ~29-31%  
319 shorter emergence time in heated treatments (dragonflies: 103 days vs 78.4, salamander 67.6  
320 days vs 52.4 days, **Fig. 3**). Salamander, but not dragonfly development was also significantly  
321 faster under high nutrient treatments and when prey arrived later, although this effect was much  
322 smaller than the warming effect (**Table 1, Fig. 3**). Salamander mass at metamorphosis was  
323 determined by interactions of all three treatments, prey arrival time, heating, and nutrients (three-  
324 way interaction,  $P = 0.0237$ ) (**Table 1, Fig. 3**): their mass increased the later prey arrived, but  
325 this increase was largest (68%) in heated treatments with high nutrients where predators (mass

326 increased from 889.5mg to 1,495.4mg). Together, these results indicate that a delay in prey  
327 arrival time increased developmental and growth rates of salamander predators, and this  
328 relationship was strengthened by nutrient addition and warming in a given community.

329 *Prey response*

330 As expected, prey that arrived later were significantly smaller during the early part of the  
331 experiment (33-38 days after start) under ambient conditions (**supplemental Table S2**). In  
332 contrast, size differences between early vs. later arriving prey were much smaller (or even  
333 absent) in heated communities (**Fig. S2**). Together with effects on predator size, this confirms  
334 that arrival treatments modified predator-prey size ratios with delay in prey arrival time and this  
335 was further modified by differences in temperature regimes. However, growth rates showed the  
336 opposite pattern and increased significantly with delay in prey arrival, indicating that  
337 experimentally delaying arrival did not negatively affect early growth rates (**supplemental**  
338 **Table S2**). In leopard frogs (with dragonfly predators) nutrient addition also significantly  
339 increased size and growth rates (**supplemental Table S2**). This suggests that prey size  
340 differences created by differences in relative arrival should decline over time, especially in  
341 heated communities and high nutrient levels.

342 Delaying prey arrival significantly increased prey mortality rates in both predator-prey  
343 systems (**Table 4, Fig 4**): a 20-day delay in prey arrival increased mortality rates on average by  
344 1.2 to 2.2 times in dragonfly and salamander predator systems respectively. Warming and  
345 nutrient addition both significantly affected mortality rates (**Table 2**), but their effects differed  
346 qualitatively from each other and between both predator-prey systems. In both predator-prey  
347 systems, nutrient addition significantly reduced prey mortality, but this effect was strongest with



348 early prey arrival and declined significantly the later prey arrived (**Table 2, Fig. 4**). As a  
349 consequence, a delay in arrival time had a stronger effect (steeper increase in mortality, **Fig. 4**) in  
350 treatments with added nutrients, but this interaction was only significant in experiments with  
351 dragonfly predators (**Table 2**). Heating significantly increased prey mortality in both  
352 experiments (**Table 2**). However, in salamander experiments, this temperature effect was much  
353 stronger when prey arrival was delayed, essentially enhancing the negative effect of delay in  
354 prey arrival time (steeper increase in mortality) (ambient: early: 136 vs late: 100 survivors;  
355 heated: early: 103 vs late: 13.5 survivors) (**Fig. 4**). Thus, nutrient addition and warming both  
356 enhanced the effects of delaying prey arrival, but nutrients enhanced the positive effect of early  
357 prey arrival while warming enhanced the negative effect of late arrival.

358 Total prey biomass production was on average significantly higher with added nutrients  
359 in both experiments and lower in heated treatments in the salamander experiment (**Table 2**). In  
360 contrast to mortality, biomass moderately increased with delay in prey arrival in the dragonfly  
361 predator system. This relationship was driven by a very strong compensatory growth response in  
362 surviving individuals; the per-capita mass of surviving prey increased in all treatments with  
363 delay in prey arrival time by up to three times in high nutrient treatments (**supplemental Fig.**  
364 **S3**). In salamander predator systems, the arrival effect was contingent on the heating treatment,  
365 with a positive relationship in ambient systems and opposite (decline with arrival time) in heated  
366 communities. The decline in heated tanks occurred because the strong compensatory growth of  
367 individuals could not overcome the even stronger increase in mortality rate in heated systems.  
368 Finally, in the dragonfly experiment where prey developed much faster, a large proportion of  
369 prey completed metamorphosis, with shorter development time in either higher temperatures or  
370 nutrients and delay in arrival (**supplemental Fig. S3**).

371 *Predator-prey feedbacks*

372 Predator size (head width) at prey introduction (indicating differences in initial  
373 predator/prey size ratio) was strongly positively related to prey survival, explaining 27% and  
374 34% of the total variation in prey survival in salamander and dragonfly predator systems  
375 respectively (with salamander:  $F_{1,48} = 55.5$ ,  $P < 0.0001$ , with dragonfly:  $F_{1,58} = 13.19$ ,  $P = 0.0006$ ,  
376 **Fig. 5**). Furthermore, final salamander mass was positively ( $F_{1,45} = 5.0$ ,  $P = 0.03$ ) and  
377 developmental time of both predators was negatively correlated (salamander:  $F_{1,45} = 18.5$   
378  $P < 0.0001$ , dragonfly:  $F_{1,56} = 13.19$ ,  $P = 0.0006$ ) with prey mortality (supplement **Fig. S4**),  
379 suggesting a feedback between consumed prey and predator growth and development.

380

381 **Discussion**

382 *Phenological shifts alter predator-prey interactions*

383 The relative timing of predator and prey phenologies can play a key role in shaping predator-  
384 prey systems. Previous research has largely focused on the concept of trophic (phenological)  
385 match/mismatch (Cushing 1969, Visser and Gienapp 2019, Kharouba and Wolkovich 2020). The  
386 trophic mismatch concept focuses on the temporal overlap of peak prey availability and peak  
387 energetic demands of predators (e.g. during reproduction)(Kharouba and Wolkovich 2020).  
388 While intuitively appealing, trophic match/mismatches are notoriously difficult to proof and  
389 explicit experimental tests are “extremely rare” (Visser and Gienapp 2019, Kharouba and  
390 Wolkovich 2020). Furthermore, this approach typically neglects that phenological shifts can also  
391 modify per-capita interaction strength (Rudolf 2019).

392 Using an experimental approach, I showed that shifts in phenologies can significantly affect  
393 both prey and predator populations. Several lines of evidence indicate that the observed effects  
394 of phenological shifts were driven by an increase in per-capita predation rates with delay in prey  
395 arrival. Consistent with previous studies (Rudolf and Singh 2013, Rasmussen and Rudolf 2016,  
396 Rudolf 2018, Rudolf and McCrory 2018, Carter and Rudolf 2019), I found no evidence that  
397 experimentally delaying prey hatching negatively affects prey performance. Indeed, late-arriving  
398 prey even grew and developed faster than early arriving prey, likely because their key food  
399 resources (periphyton) increased during that period. However, the increase in prey mortality with  
400 delay in its arrival time is consistent with an increase in per capita predation rates. Delaying prey  
401 arrival increased prey mortality, which was correlated with increased growth and developmental  
402 rates of predators. An increase in predation also explains why prey per-capita mass and  
403 developmental rates increased: predation reduced the density of prey, which reduced  
404 intraspecific competition in the prey and allowed prey to grow and develop faster. Similar plastic  
405 responses have been observed in other studies (Anderson et al. 2017, Carter and Rudolf 2019)  
406 and explain why prey biomass even increased with delay in prey arrival time.

407 The increase in predation rates with delay in prey arrival is consistent with size-mediated  
408 priority effects. Arriving earlier than their prey allows predators to grow to a larger size when  
409 interactions are initiated, which in turn should increase per-capita predation rates. Furthermore,  
410 since prey typically grow faster than predators, this size advantage of predators can also prolong  
411 the time prey are within a vulnerable size range of gape-limited predators. Consistent with this  
412 expectations, the size of predators at the time of prey introduction was a significant predictor of  
413 prey mortality and explained ~30% of the variation in prey mortality. Size-mediated priority  
414 effects are known to play important role in mediating effects of phenological shifts in

415 competitive systems (Rudolf and Singh 2013, Rudolf 2018, Rudolf and McCrory 2018,  
416 Blackford et al. 2020), with important consequences for long-term dynamics (Rudolf 2019).  
417 However, they are rarely considered in the predator-prey or trophic mismatch literature (Visser  
418 and Both 2005, Visser and Gienapp 2019, Kharouba and Wolkovich 2020). Yet, such changes in  
419 per-capita effects are likely to be common, especially when interactions occur among growing  
420 predators and prey (Wilbur 1988, Urban 2007, Yang and Rudolf 2010, Nosaka et al. 2014,  
421 Rasmussen and Rudolf 2016).

422 *The role of predator and prey traits in mediating phenological shifts*

423 Predator-prey systems can differ in many ways from each other (e.g. growth rates, per-capita  
424 predation rates, predator and prey behavior, gape-limitation, etc.) and these differences could  
425 alter the effects of phenological shifts and relative importance of the environmental context. The  
426 two different systems I used here showed some remarkably similar patterns but also highlighted  
427 some key differences. Only salamander predators were strongly affected by prey arrival and its  
428 interaction with environmental conditions, while dragonfly predators only responded to changes  
429 in temperature regimes. This difference could at least partly be driven by the fact that  
430 salamanders are much more gape-limited. Size measurements indicate that most prey reached a  
431 size refuge from salamander predation (i.e. body width > salamander mouth diameter) at some  
432 point during the experiment. When prey arrive at the same time as predators, this likely  
433 happened early when predators were still small, decoupling prey performance and predator traits  
434 (e.g. no or weak correlation of predator mass and development rates and prey mortality,  
435 supplement). In contrast, when salamanders were relatively larger when prey arrived later, they  
436 were able to consume prey for longer (aided by a corresponding increase in predator growth  
437 rates). In contrast, dragonflies could always attack and kill prey, even when the prey was much

438 larger. The dragonfly predator-prey systems thus should be much less sensitive to variation in  
439 initial predator-prey size ratio or relative growth rates. This helps explain why dragonfly  
440 predators were not affected by prey arrival time.

441 These results suggest that some effects of phenological shifts appear to be consistent across  
442 predator-prey systems, while others depend on the details of predator and prey traits. To date, we  
443 are missing studies that are specifically aimed to link traits of interacting species to the effects of  
444 phenological shifts. Yet identifying general mechanisms that link species traits to effects of  
445 phenological shifts is key to gain a comprehensive and predictive understanding of seasonal  
446 dynamics of communities and how they will be affected by future climate change. The results  
447 presented here provide an important step towards achieving this goal, but much more work is  
448 needed in a diversity of systems to address this gap in our knowledge.

449 *Environmental context mediates effects of phenological shifts*

450 Environmental conditions frequently differ across systems and often co-vary with  
451 phenological shifts (Benard 2015, Cohen et al. 2018). I found that differences in environmental  
452 conditions can modify the effects of phenological shifts in predator-prey systems and in some  
453 rare instances multiple environmental factors can even interact with each other. However,  
454 warming and nutrient additions had qualitatively different effects. Warmer conditions increased  
455 and high nutrient levels dampened the negative effect of late arrival for prey (i.e. steeper increase  
456 in mortality with delay in arrival time). Furthermore, the effect of warming was stronger in the  
457 salamander predator system, while the effect of nutrients was stronger in the dragonfly system.

458 The interaction of warming and phenological shifts is again consistent with size-mediated  
459 priority effects. Warming had by far the strongest effect on initial predator size and increased

460 predator size with delay in prey arrival relative to ambient conditions. Since predation rates are  
461 typically positively correlated with predator/prey size ratios (Urban 2007), this helps explain  
462 why delaying prey arrival time was associated with a steeper increase in prey mortality compared  
463 to ambient conditions. This size-mediated priority effect could also have been further enhanced  
464 by an increase in size-specific predation rates under warmer conditions (Jara et al. 2019).

465 In contrast to warming, nutrient addition enhanced the positive effects of early arrival.  
466 Nutrient addition had little or only minor effects on initial predator growth rates and predator  
467 sizes did not differ across prey arrival times. However, nutrient addition did increase initial and  
468 final growth rates as well the developmental rates of prey. This contrasting effect of nutrients on  
469 predator vs. prey reflects the simple fact that they consume different resources: prey (but not  
470 predators) consume periphyton, which was increased by nutrient addition (see supplement). It is  
471 also possible that differences in nutrient availability altered prey (or predator) behavior and  
472 thereby changed predation rates. Elucidating the relative contribution of different potential  
473 mechanisms was beyond the scope of this study, but the results presented here suggest that  
474 additional and previously overlooked factors (i.e. beyond size-mediated priority effects) played an  
475 important role. The results highlight the complex and dynamic interaction between  
476 environmental conditions and phenological shifts and the need for further research to understand  
477 how general these patterns are and what other mechanisms are involved.

478 In the broader context of climate change, the results also suggest that climate-mediated shifts  
479 in phenologies or temperature patterns (Benard 2015, Cohen et al. 2018) depend on how both are  
480 correlated and local conditions. For instance, a delay in prey arrival would have a much more  
481 negative effect on prey survival if it is correlated with an increase in temperature. Similarly, a  
482 delay in prey arrival is likely to have weaker effects in systems with high nutrient (resource)

483 availability for the prey. These results highlight that phenological shifts need to be considered in  
484 the respective environmental context of a system, and how they are correlated with shifts in  
485 environmental conditions.

#### 486 **Data Availability**

487 *All data will be made publicly available with corresponding code for statistical analysis on*  
488 *dryad with publication*

#### 489 **Acknowledgments**

490 I would like to thank Amber Roman, Zach Costa, Rebecca Maher, Beineng Zhan, Jane Giang,  
491 Lilly Stockset, Anecia Gentles, Bianca Romado, Elaine Shen and Avery Twitchik-Hayne for  
492 help with field and lab work, and Amy Dunham and Tom Miller for help in developing the ideas  
493 in the manuscript. This work was in part supported by funding from NSF award DEB-1256860  
494 and DEB-1655626.

495

#### 496 **References**

- 497 Alford, R. A. 1989. Variation in predator phenology affects predator performance and prey  
498 community composition. *Ecology* **70**:206-219.
- 499 Anderson, T. L., F. E. Rowland, and R. D. Semlitsch. 2017. Variation in phenology and density  
500 differentially affects predator–prey interactions between salamanders. *Oecologia*  
501 **185**:475-486.
- 502 Barton, B. T., and O. J. Schmitz. 2009. Experimental warming transforms multiple predator  
503 effects in a grassland food web. *Ecology Letters* **12**:1317-1325.

- 504 Benard, M. F. 2015. Warmer winters reduce frog fecundity and shift breeding phenology, which  
505 consequently alters larval development and metamorphic timing. *Global Change Biology*  
506 **21**:1058-1065.
- 507 Blackford, C., R. M. Germain, and B. Gilbert. 2020. Species Differences in Phenology Shape  
508 Coexistence. *The American Naturalist* **195**:E168-E180.
- 509 Caldwell, J., J. Thorp, and T. Jervey. 1980. Predator-prey relationships among larval dragonflies,  
510 salamanders, and frogs. *Oecologia* **46**:285-289.
- 511 Carter, S. K., and V. H. W. Rudolf. 2019. Shifts in phenological mean and synchrony interact to  
512 shape competitive outcomes. *Ecology* **100**:e02826.
- 513 Carter, S. K., D. Saenz, and V. H. Rudolf. 2018. Shifts in phenological distributions reshape  
514 interaction potential in natural communities. *Ecology Letters* **21**:1143-1151.
- 515 Chesson, J. 1989. The effect of alternative prey on the functional response of *Notonecta*  
516 *hoffmani*. *Ecology* **70**:1227-1235.
- 517 Cohen, J. M., M. J. Lajeunesse, and J. R. Rohr. 2018. A global synthesis of animal phenological  
518 responses to climate change. *Nature Climate Change* **8**:224-228.
- 519 Cushing, D. 1969. The regularity of the spawning season of some fishes. *ICES Journal of Marine*  
520 *Science* **33**:81-92.
- 521 Dijkstra, J. A., E. L. Westerman, and L. G. Harris. 2011. The effects of climate change on  
522 species composition, succession and phenology: a case study. *Global Change Biology*  
523 **17**:2360-2369.
- 524 Durant, J. M., *et al.* 2007. Climate and the match or mismatch between predator requirements  
525 and resource availability. *Climate research* **33**:271-283.



- 526 Eaton, A. D., *et al.* 2005. Standard methods for examination of water and wastewater. American  
527 Public Health Association, American Water Works Association, Water Environment  
528 Federation.
- 529 Heino, J., R. Virkkala, and H. Toivonen. 2009. Climate change and freshwater biodiversity:  
530 detected patterns, future trends and adaptations in northern regions. *Biological Review*  
531 **84**:39-54.
- 532 Jara, F. G., *et al.* 2019. Warming-induced shifts in amphibian phenology and behavior lead to  
533 altered predator–prey dynamics. *Oecologia* **189**:803-813.
- 534 Kharouba, H. M., *et al.* 2018. Global shifts in the phenological synchrony of species interactions  
535 over recent decades. *Proceedings of the National Academy of Sciences* **115**:5211-5216.
- 536 Kharouba, H. M., and E. M. Wolkovich. 2020. Disconnects between ecological theory and data  
537 in phenological mismatch research. *Nature Climate Change* **10**:406-415.
- 538 Kratina, P., *et al.* 2012. Warming modifies trophic cascades and eutrophication in experimental  
539 freshwater communities. *Ecology* **93**:1421-1430.
- 540 Mischler, J. A., P. G. Taylor, and A. R. Townsend. 2014. Nitrogen Limitation of Pond  
541 Ecosystems on the Plains of Eastern Colorado. *PLOS ONE* **9**:e95757.
- 542 Nosaka, M., N. Katayama, and O. Kishida. 2014. Feedback between size balance and  
543 consumption strongly affects the consequences of hatching phenology in size-dependent  
544 predator–prey interactions. *Oikos* **124**:225-234.
- 545 Ovaskainen, O., *et al.* 2013. Community-level phenological response to climate change.  
546 *Proceedings of the National Academy of Sciences* **110**:13434-13439.
- 547 Parmesan, C., and G. Yohe. 2003. A globally coherent fingerprint of climate change impacts  
548 across natural systems. *Nature* **421**:37-42.

- 549 Rafferty, N. E., *et al.* 2013. Phenological overlap of interacting species in a changing climate: an  
550 assessment of available approaches. *Ecology and Evolution* **3**:3183-3193.
- 551 Rasmussen, N. L., and V. H. W. Rudolf. 2016. Individual and combined effects of two types of  
552 phenological shifts on predator–prey interactions. *Ecology* **97**:3414-3421.
- 553 Rasmussen, N. L., B. G. Van Allen, and V. H. W. Rudolf. 2014. Linking phenological shifts to  
554 species interactions through size-mediated priority effects. *Journal of Animal Ecology*  
555 **83**:1206-1215.
- 556 Root, T. L., *et al.* 2003. Fingerprints of global warming on wild animals and plants. *Nature*  
557 **421**:57-60.
- 558 Roslin, T., *et al.* 2021. Phenological shifts of abiotic events, producers and consumers across a  
559 continent. *Nature Climate Change* **11**:241-248.
- 560 Rudolf, V. H. W. 2008. Impact of cannibalism on predator-prey dynamics: Size-structured  
561 interactions and apparent mutualism. *Ecology* **89**:1650-1660.
- 562 Rudolf, V. H. W. 2018. Nonlinear effects of phenological shifts link interannual variation to  
563 species interactions. *Journal of Animal Ecology* **87**:1395-1406.
- 564 Rudolf, V. H. W. 2019. The role of seasonal timing and phenological shifts for species  
565 coexistence. *Ecology Letters* **22**:1324-1338.
- 566 Rudolf, V. H. W., and S. McCrory. 2018. Resource limitation alters effects of phenological shifts  
567 on inter-specific competition. *Oecologia* **188**:515-523.
- 568 Rudolf, V. H. W., and N. L. Rasmussen. 2013a. Ontogenetic functional diversity: Size-structure  
569 of a keystone predator drives functioning of a complex ecosystem. *Ecology* **94**:1046-  
570 1056.

- 571 Rudolf, V. H. W., and N. L. Rasmussen. 2013b. Population structure determines functional  
572 differences among species and ecosystem processes. *Nature Communications* **4**:2318.
- 573 Rudolf, V. H. W., and M. Singh. 2013. Disentangling climate change effects on species  
574 interactions: effects of temperature, phenological shifts, and body size. *Oecologia*  
575 **173**:1043-1052.
- 576 Saenz, D., *et al.* 2006. Abiotic correlates of anuran calling phenology: The importance of rain,  
577 temperature, and season. *Herpetological Monographs*:64-82.
- 578 Schindler, D. W. 1977. Evolution of phosphorus limitation in lakes. *Science* **195**:260-262.
- 579 Shurin, J. B., *et al.* 2012. Warming shifts top-down and bottom-up control of pond food web  
580 structure and function. *Philosophical Transactions of the Royal Society B-Biological*  
581 *Sciences* **367**:3008-3017.
- 582 Skelly, D. K., L. K. Freidenburg, and J. M. Kiesecker. 2002. Forest canopy and the performance  
583 of larval amphibians. *Ecology* **83**:983-992.
- 584 Todd, B. D., *et al.* 2011. Climate change correlates with rapid delays and advancements in  
585 reproductive timing in an amphibian community. *Proceedings of the Royal Society B:*  
586 *Biological Sciences* **278**:2191-2197.
- 587 Uiterwaal, S. F., and J. P. DeLong. 2020. Functional responses are maximized at intermediate  
588 temperatures. *Ecology* **101**:e02975.
- 589 Urban, M. 2007. Predator size and phenology shape prey survival in temporary ponds. *Oecologia*  
590 **154**:571-580.
- 591 Urban, M. C. 2008. Salamander evolution across a latitudinal cline in gape-limited predation  
592 risk. *Oikos* **117**:1037-1049.

- 593 Visser, M. E., and C. Both. 2005. Shifts in phenology due to global climate change: the need for  
594 a yardstick. *Proceedings of the Royal Society of London Series B-Biological Sciences*  
595 **272**:2561-2569.
- 596 Visser, M. E., and P. Gienapp. 2019. Evolutionary and demographic consequences of  
597 phenological mismatches. *Nature ecology & evolution* **3**:879-885.
- 598 Visser, M. E., and L. J. M. Holleman. 2001. Warmer springs disrupt the synchrony of oak and  
599 winter moth phenology. *Proceedings of the Royal Society of London Series B-Biological*  
600 *Sciences* **268**:289-294.
- 601 Wellborn, G. A., D. K. Skelly, and E. E. Werner. 1996. Mechanisms creating community  
602 structure across a freshwater habitat gradient. *Annual Review of Ecology and*  
603 *Systematics* **27**:337-363.
- 604 Wilbur, H. M. 1988. Interactions between growing predators and growing prey. Pages 157-172  
605 *in* B. Ebenman and L. Persson, editors. *Size-structured populations - ecology and*  
606 *evolution*. Springer Verlag, Berlin.
- 607 Wilbur, H. M. 1997. Experimental ecology of food webs: Complex systems in temporary ponds.  
608 *Ecology* **78**:2279-2302.
- 609 Yang, L. H., and V. H. W. Rudolf. 2010. Phenology, ontogeny, and the effects of climate change  
610 on the timing of species interactions. *Ecology Letters* **13**:1-10.

611

612

613 **Table 1: Effects of delay in prey arrival time (ArrivalT), heating, and nutrient addition treatments on predator demographic**  
 614 **traits.** Values indicate Wald Chisquare statistics for a given demographic trait. All values show type III statistics for salamander and  
 615 size at prey arrival for dragonflies and type II for remaining dragonfly survival and emergence time. ns indicates that interactions were  
 616 not significant ( $P>0.05$ ) and dropped for final model for type III statistics to facilitate interpretation of main effects.

| <u>Terms</u>               | <b>Salamander</b>           |                 |                       |             | <b>Dragonfly</b>            |                 |                       |
|----------------------------|-----------------------------|-----------------|-----------------------|-------------|-----------------------------|-----------------|-----------------------|
|                            | <u>Size at prey arrival</u> | <u>Survival</u> | <u>Emergence time</u> | <u>Mass</u> | <u>Size at prey arrival</u> | <u>Survival</u> | <u>Emergence time</u> |
| Heating                    | 64.00****                   | 0.17            | 92.58****             | 1.27        | 5.15*                       | 0.28            | 17768****             |
| Nutrients                  | 0.02                        | 0.78            | 5.32*                 | 11.65***    | 0.07                        | 2.41            | 0.83                  |
| ArrivalT                   | 5.32*                       | 6.47*           | 8.90**                | 2.41        | 4.48*                       | 2.04            | 1.79                  |
| Heating:Nutrients          | 3.99*                       | 3.62*           | ns                    | 5.66*       | ns                          | 0.17            | 2.18                  |
| Heating:ArrivalT           | 64.11****                   | ns              | ns                    | 2.40        | ns                          | 0.08            | 0.99                  |
| Nutrients:ArrivalT         | 0.02                        | 5.65*           | ns                    | 2.05        | ns                          | 0.70            | 4.42*                 |
| Heating:Nutrients:ArrivalT | 3.99*                       | ns              | ns                    | 5.12*       | ns                          | 10.11**         | 1.79                  |

617 \*  $P\leq 0.05$ , \*\*  $P<0.01$ , \*\*\* $P<0.001$ , \*\*\*\* $P<0.0001$

618

619 **Table 2: Effects of delay in prey arrival time (ArrivalT), heating, and nutrient addition**  
 620 **treatments on prey demographic traits.** Biomass production indicates total biomass produced  
 621 per time averaged across the duration of the experiment. Values indicate Wald Chisquare  
 622 statistics for a given demographic trait. All values show type III statistics for salamander and size  
 623 at prey arrival for dragonflies and type II for remaining dragonfly survival and emergence time.  
 624 ns indicates that interactions were not significant ( $p > 0.05$ ) and dropped for the final model for  
 625 type III statistics to facilitate interpretation of main effects.

| <u>Terms</u>               | <b>Bronze frog<br/>(with salamander predator)</b> |                               | <b>Leopard frog<br/>(with dragonfly predator)</b> |                               |
|----------------------------|---------------------------------------------------|-------------------------------|---------------------------------------------------|-------------------------------|
|                            | <u>Mortality rate</u>                             | <u>Biomass<br/>production</u> | <u>Mortality rate</u>                             | <u>Biomass<br/>production</u> |
| Heating                    | 2.10                                              | <b>8.73**</b>                 | <b>26.07****</b>                                  | 1.03                          |
| Nutrients                  | <b>4.17*</b>                                      | <b>25.25****</b>              | <b>55.61****</b>                                  | <b>5.09*</b>                  |
| ArrivalT                   | <b>8.07**</b>                                     | 2.96                          | <b>95.48****</b>                                  | <b>7.84**</b>                 |
| Heating:Nutrients          | ns                                                | <b>5.92*</b>                  | 2.37                                              | 1.89                          |
| Heating:ArrivalT           | <b>4.46*</b>                                      | <b>3.79*</b>                  | 3.31                                              | 1.40                          |
| Nutrients:ArrivalT         | ns                                                | ns                            | <b>4.39*</b>                                      | 1.04                          |
| Heating:Nutrients:ArrivalT | ns                                                | ns                            | 0.71                                              | 0.27                          |

626 \*  $p \leq 0.05$ , \*\*  $p < 0.01$ , \*\*\*  $p < 0.001$ , \*\*\*\*  $p < 0.0001$

627

628 **Figure 1: Experimental setup and study system.** (A) The two predator-prey systems used in  
629 this study. Salamander larvae preying on bronze frogs, and dragonfly larvae preying on leopard  
630 frogs. Both systems differ in various ways from each other (see methods for details) including  
631 how much gape limitation plays a role in predation. (B) Phenology treatments manipulated  
632 relative arrival time of prey, which were either added on the same day as predators or arrival was  
633 delayed by 10 or 20 days relative to predator to test for effects of phenological shifts. These  
634 phenology treatments were repeated across (C) different environmental conditions, by  
635 manipulating temperature (heated vs. ambient) or availability of limiting nutrients in  
636 experimental mesocosms. Pictures show representative examples of how treatments influenced  
637 mesocosm communities. Insert shows temporal fluctuations in daily temperatures for heated vs.  
638 ambient mesocosms.

639

640 **Figure 2: Change in predator size with delay (10 and 20 days) in prey arrival across**  
641 **different temperature (heated) and nutrient conditions.** Days indicate the number of days that  
642 have passed after predators were added to the experiment. Large symbols indicate treatment  
643 mean  $\pm 1$  SE, small symbols indicate individual mesocosm means. Symbols of different  
644 treatments are offset horizontally for a given sample day for visual clarity. Dashed grey  
645 horizontal lines indicate the respective mean size at the start of the experiment (day 0). Note that  
646 for logistic reasons, the first sample was taken a few days later for dragonflies, and samples size  
647 was smaller for dragonfly experiment because subsamples were restricted to replicates without  
648 tadpoles, while this was not the case for salamander experiment (tadpole presence did not  
649 significantly affect predator size, see methods for more details).

650

651 **Figure 3: Effects of delay in prey arrival time on predator demographic traits across**  
652 **different nutrient and temperature conditions.** Large symbols indicate mean  $\pm 1$  SE, small  
653 symbols indicate mesocosm means. Symbols of different treatments are offset horizontally for a  
654 given arrival day treatment for visual clarity. The grey point in the top right panel indicates an  
655 outlier and was not included in the mean or final statistical analysis (see results).

656

657 **Figure 4: Effect of delay in prey arrival time on prey demographic traits across different**  
658 **nutrient and temperature conditions.** Mortality rate and biomass production indicate a daily  
659 change in prey survival and total dry biomass within a given treatment. Large symbols indicate  
660 mean  $\pm 1$  SE, small symbols indicate mesocosm means. Symbols of different treatments are  
661 offset horizontally for a given arrival day treatment for visual clarity.

662

663 **Figure 5: Relationship between predator size at prey introduction and prey survival.** (A)  
664 salamander –bronze frog system, (B) dragonfly-leopard frog system. Grey lines indicate  
665 significant linear relationships. Symbols indicate individual replicates in a given treatment and  
666 indicate the mean size (measured as head width) of predators. Note differences in y-axis scaling  
667 between panels. Points are jittered by 0.01 for clarity to avoid overlapping data points.

668



669 **Figure 1**

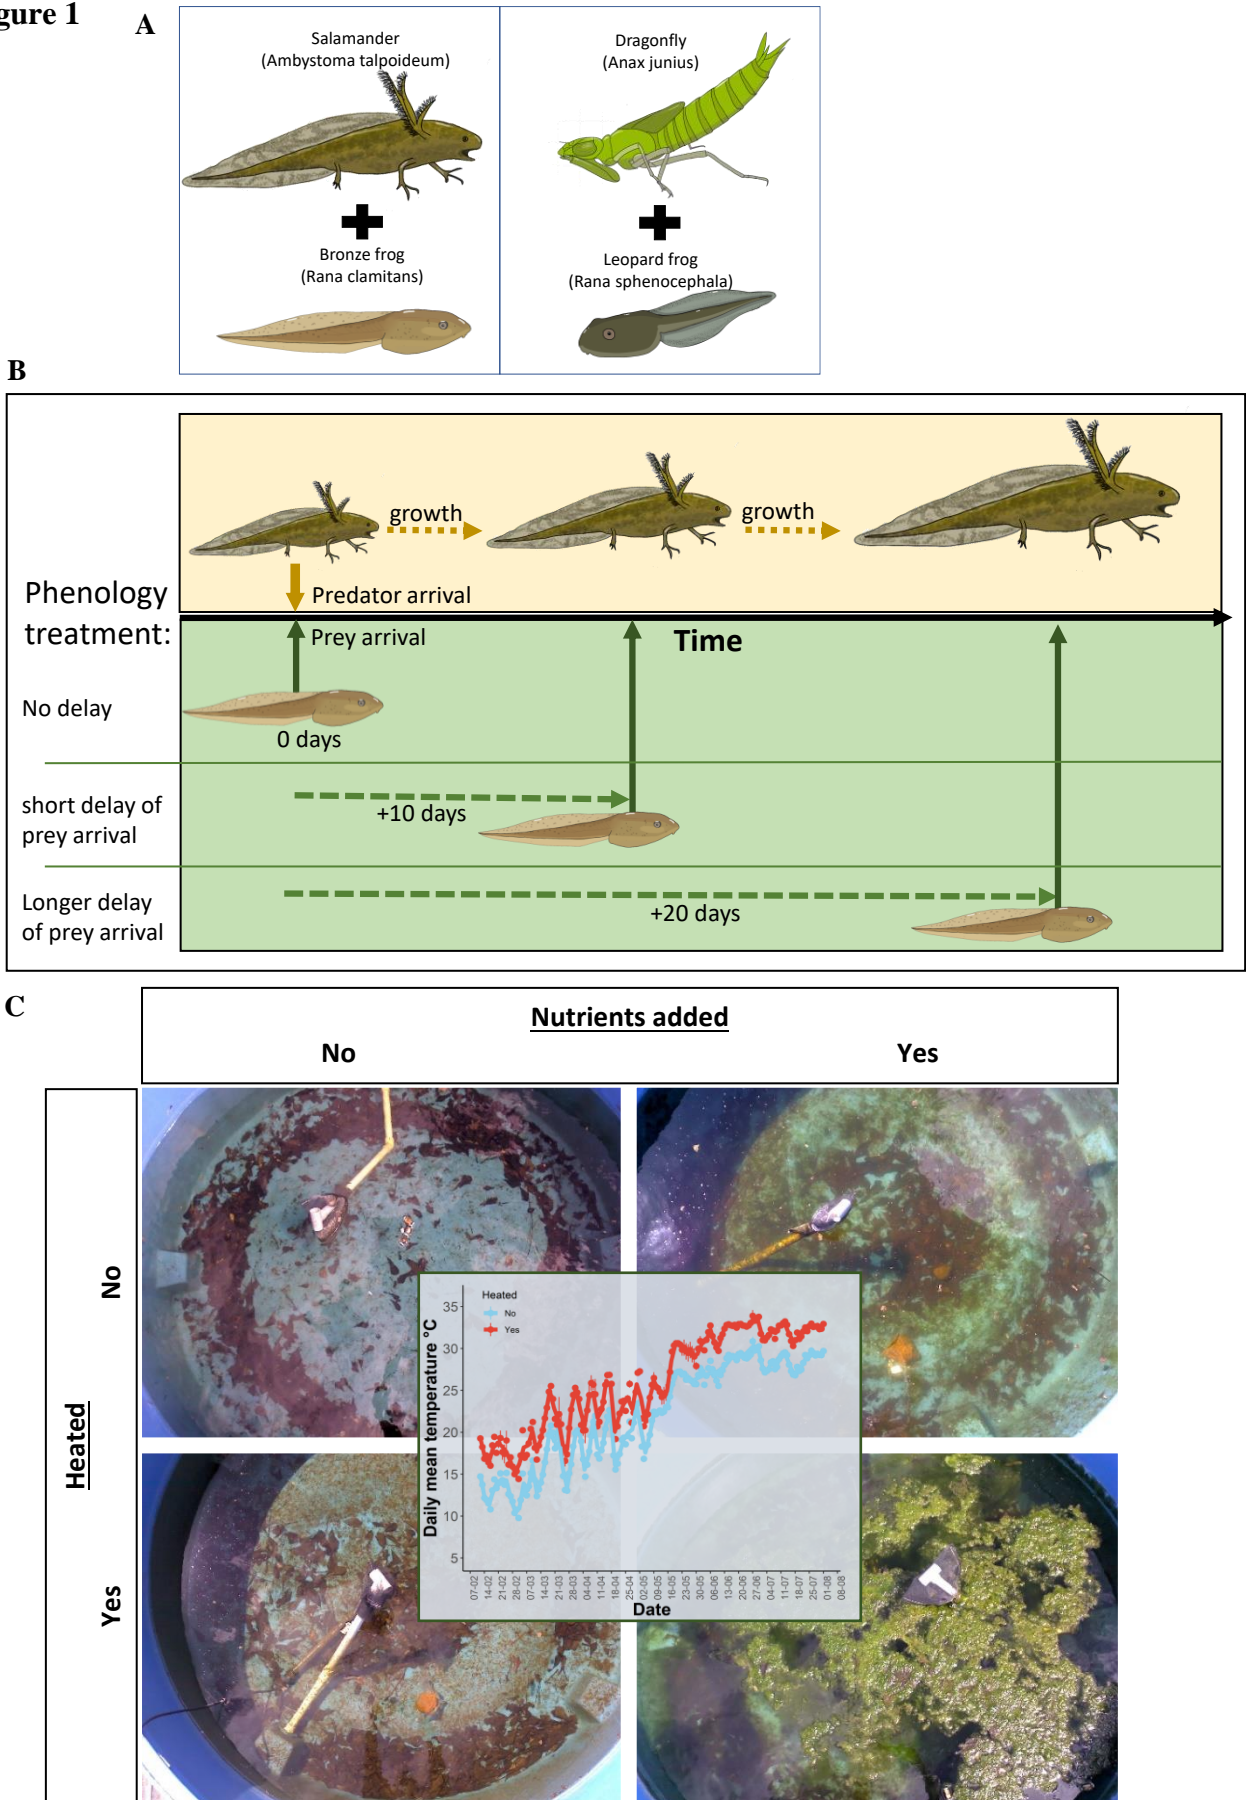

670 **Figure 2**

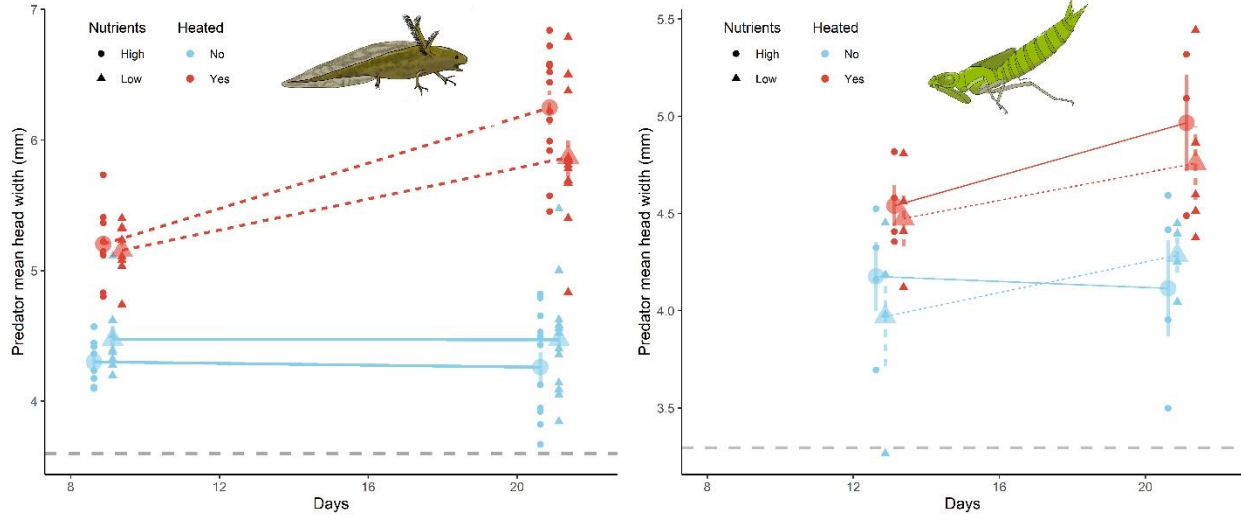

671

672

673 **Figure 3**

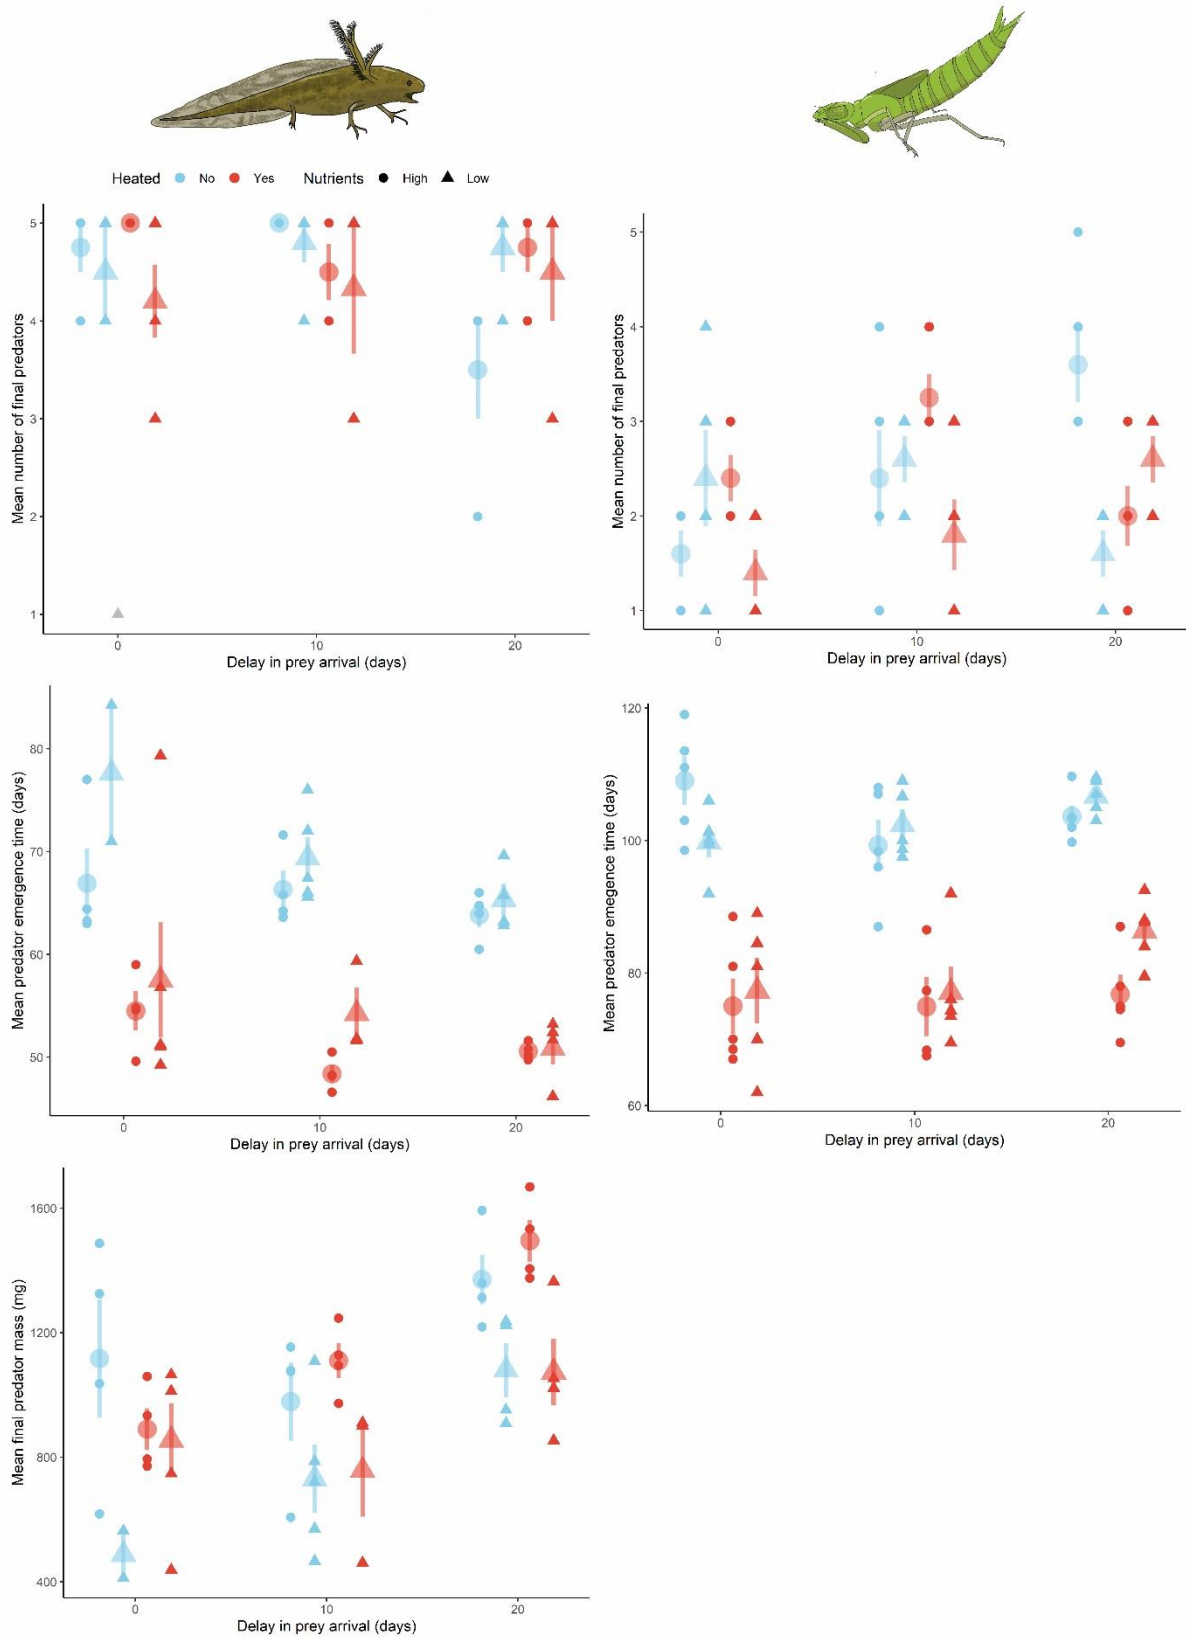

674 **Figure 4**

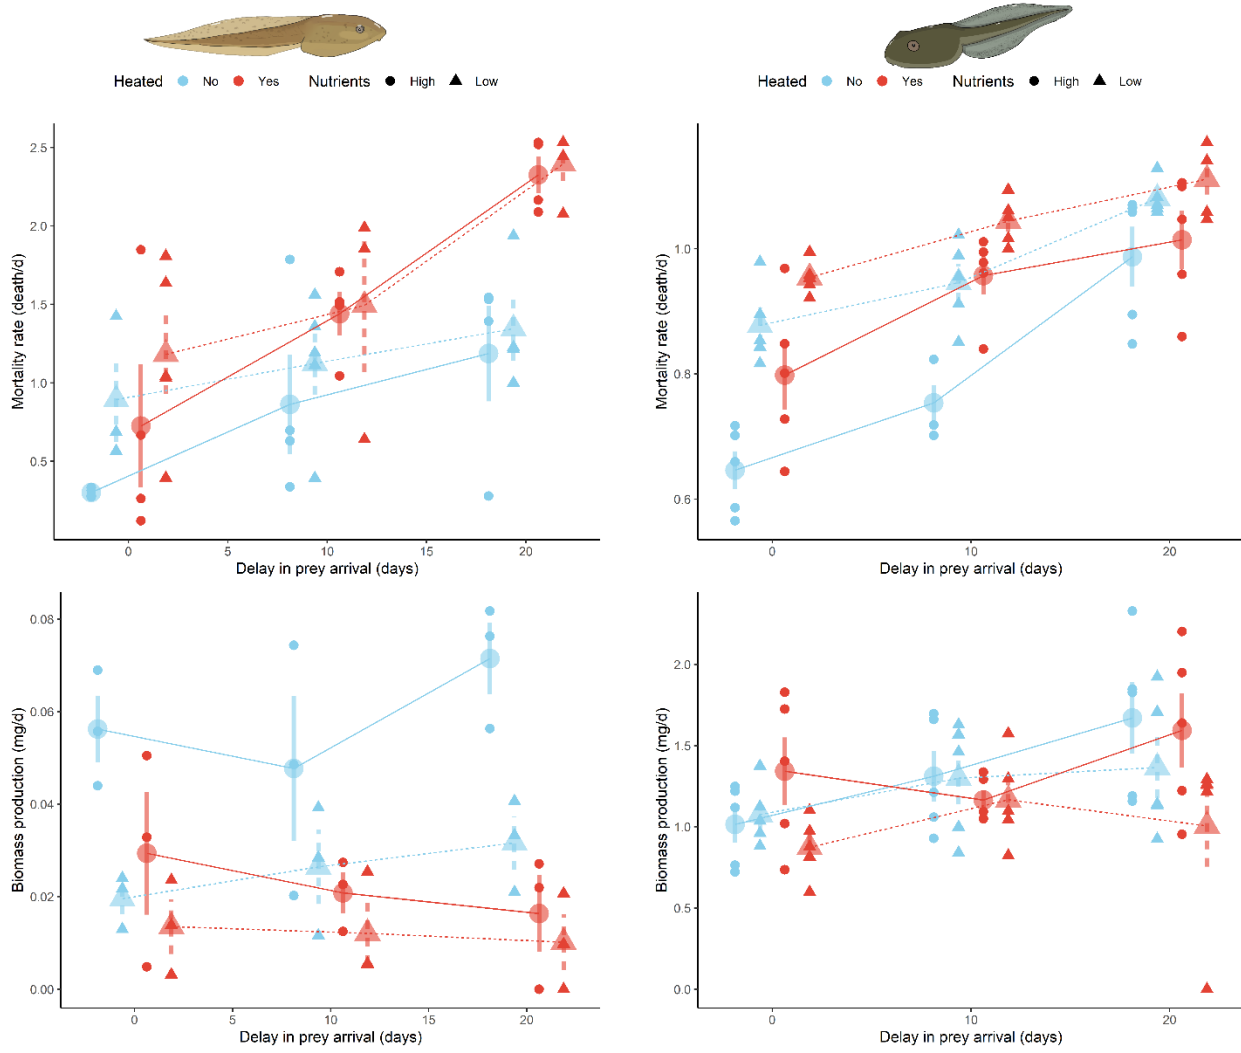

675

676

677 **Figure 5**

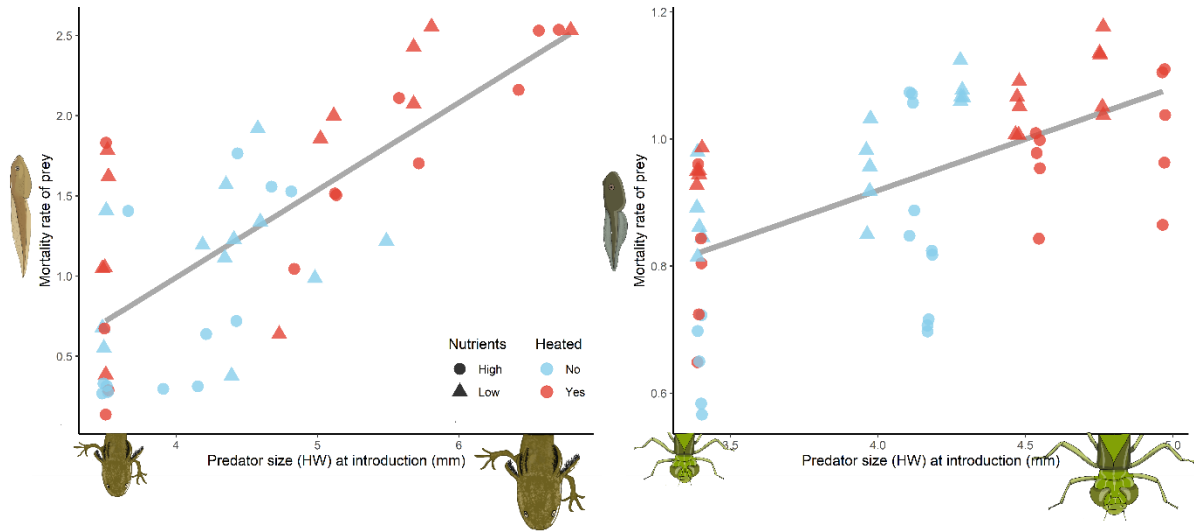

678
